# Supplementary material for: Using structural connectivity to augment community structure in EEG functional connectivity
Source: bioRxiv or medRxiv preprint supplement (doi:10.1101/831743), 2020-05-07
Supplement: Supplementary file [file media-1.pdf]

## Supplementary materials for manuscript:

# Using structural connectivity to augment community structure in EEG functional connectivity

Katharina Glomb<sup>1\*</sup>, Emeline Mullier<sup>1</sup>, Margherita Carboni<sup>2,3</sup>, Maria Rubega<sup>3</sup>, Giannarita Iannotti<sup>3</sup>, Sebastien Tourbier<sup>1</sup>, Martin Seeber<sup>3</sup>, Serge Vulliemoz<sup>2</sup>, Patric Hagmann<sup>1</sup>

1 Connectomics Lab, Department of Radiology, University Hospital of Lausanne and University of Lausanne, Lausanne (CHUV-UNIL), Vaud, Switzerland

2 EEG and Epilepsy, Neurology, University Hospitals of Geneva and University of Geneva, Geneva, Switzerland

3 Functional Brain Mapping Lab, Department of Fundamental Neurosciences, University of Geneva, Geneva, Switzerland

4 Department of Neurosciences, University of Padova, Padova, Italy

Table S1: (related to Figure 2A) Detailed GLM results with outputs of Matlab's `stepwiseglm()` and explained variances. *Estimate* is the coefficient value, *SE* is the standard error. Only significant effects are listed. For explained variances, the variables are listed in the order in which they were entered into the model; *r2 full (cum.)* and *r2 single* corresponds to the explained variance of the predictor variable in the full model, cumulatively, and the GLM in which the variable was the only predictor (additionally to the intercept). SCSi: search information of the structural connectivity, ED: Euclidean distance, RRV: relative regional variance.

### alpha band without filtering

#### coefficients

|             | Estimate  | SE       | tStat     | pValue    |
|-------------|-----------|----------|-----------|-----------|
| (Intercept) | 1.24E+00  | 2.02E-02 | 6.14E+01  | 0.00E+00  |
| SCSi        | -9.43E-02 | 3.63E-03 | -2.60E+01 | 1.09E-130 |
| ED          | -1.19E-02 | 3.09E-04 | -3.84E+01 | 4.49E-249 |
| RRV         | 5.05E-01  | 4.32E-02 | 1.17E+01  | 1.11E-30  |
| SC:ED       | 1.19E-03  | 4.99E-05 | 2.38E+01  | 5.04E-112 |
| ED:RRV      | -4.00E-03 | 6.04E-04 | -6.63E+00 | 4.18E-11  |

#### explained variances

|    |        | r2 full (cum.) | r2 single |
|----|--------|----------------|-----------|
| 1. | ED     | 0.55           | 0.55      |
| 2. | RRV    | 0.57           | 0.02      |
| 3. | SCSi   | 0.59           | 0.14      |
| 4. | SC:ED  | 0.67           | 0.36      |
| 5. | ED:RRV | 0.67           | 0.01      |

**beta band without filtering**  
coefficients

|             | Estimate  | SE       | tStat     | pValue    |
|-------------|-----------|----------|-----------|-----------|
| (Intercept) | 1.56E+00  | 3.04E-02 | 5.14E+01  | 0.00E+00  |
| SCSI        | -9.78E-02 | 4.67E-03 | -2.09E+01 | 3.41E-89  |
| ED          | -1.34E-02 | 4.41E-04 | -3.04E+01 | 3.37E-170 |
| ROlsize     | -2.42E-05 | 4.23E-06 | -5.73E+00 | 1.13E-08  |
| RRV         | 2.21E-01  | 1.60E-02 | 1.38E+01  | 7.92E-42  |
| SC:ED       | 1.07E-03  | 5.51E-05 | 1.95E+01  | 4.63E-78  |
| SC:ROlsize  | 3.25E-06  | 6.97E-07 | 4.66E+00  | 3.34E-06  |
| ED:ROlsize  | 1.66E-07  | 5.66E-08 | 2.93E+00  | 3.41E-03  |

explained variances

|    |            | r2 full (cum.) | r2 single |
|----|------------|----------------|-----------|
| 1. | ED         | 0.58           | 0.58      |
| 2. | RRV        | 0.59           | 0.01      |
| 3. | SCSI       | 0.61           | 0.15      |
| 4. | SC:ED      | 0.66           | 0.39      |
| 5. | ROlsize    | 0.66           | 0.00      |
| 6. | SC:ROlsize | 0.67           | 0.05      |
| 7. | ED:ROlsize | 0.67           | 0.17      |

**gamma band without filtering**  
coefficients

|             | Estimate  | SE       | tStat     | pValue    |
|-------------|-----------|----------|-----------|-----------|
| (Intercept) | 1.17E+00  | 1.94E-02 | 6.01E+01  | 0.00E+00  |
| SCSI        | -8.63E-02 | 3.49E-03 | -2.47E+01 | 1.56E-119 |
| ED          | -1.12E-02 | 2.98E-04 | -3.76E+01 | 8.06E-241 |
| RRV         | 3.30E-01  | 4.16E-02 | 7.94E+00  | 3.27E-15  |
| SC:ED       | 1.06E-03  | 4.80E-05 | 2.22E+01  | 1.28E-98  |
| ED:RRV      | -2.11E-03 | 5.81E-04 | -3.63E+00 | 2.87E-04  |

explained variances

|    |        | r2 full (cum.) | r2 single |
|----|--------|----------------|-----------|
| 1. | ED     | 0.56           | 0.56      |
| 2. | RRV    | 0.57           | 0.01      |
| 3. | SCSI   | 0.59           | 0.16      |
| 4. | SC:ED  | 0.66           | 0.38      |
| 5. | ED:RRV | 0.66           | 0.01      |

**alpha band with filtering** (SC, G=100, best fit to fMRI-FC)

coefficients

|              | Estimate  | SE       | tStat     | pValue    |
|--------------|-----------|----------|-----------|-----------|
| (Intercept)  | 1.78E+00  | 4.14E-02 | 4.30E+01  | 2.30E-296 |
| SCSI         | -1.43E-01 | 6.58E-03 | -2.17E+01 | 3.28E-95  |
| ED           | -1.48E-02 | 5.24E-04 | -2.83E+01 | 1.53E-151 |
| ROIsizes     | 1.29E-05  | 5.46E-06 | 2.37E+00  | 1.81E-02  |
| RRV          | -2.13E-01 | 7.07E-02 | -3.01E+00 | 2.63E-03  |
| SC:ED        | 1.38E-03  | 6.52E-05 | 2.11E+01  | 1.49E-90  |
| SC:ROIsizes  | -3.42E-06 | 9.44E-07 | -3.62E+00 | 2.97E-04  |
| SC:RRV       | 4.75E-02  | 8.69E-03 | 5.47E+00  | 5.03E-08  |
| ED:ROIsizes  | 4.45E-07  | 6.73E-08 | 6.62E+00  | 4.51E-11  |
| ROIsizes:RRV | 2.93E-05  | 9.28E-06 | 3.16E+00  | 1.61E-03  |

explained variances

|    |               | r2 full (cum.) | r2 single |
|----|---------------|----------------|-----------|
| 1. | ED            | 0.41           | 0.41      |
| 2. | SCSI          | 0.57           | 0.39      |
| 3. | SCSI:ED       | 0.62           | 0.47      |
| 4. | ROIsizes      | 0.65           | 0.09      |
| 5. | RRV           | 0.67           | 0.00      |
| 6. | SCSI:RRV      | 0.68           | 0.03      |
| 7. | ED:ROIsizes   | 0.68           | 0.02      |
| 8. | SCSI:ROIsizes | 0.68           | 0.02      |
| 9. | ROIsizes:RRV  | 0.68           | 8.00E-04  |

**beta band with filtering (SC, G=100, best fit to fMRI-FC)**  
coefficients

|             | Estimate  | SE       | tStat     | pValue    |
|-------------|-----------|----------|-----------|-----------|
| (Intercept) | 1.91E+00  | 4.34E-02 | 4.40E+01  | 1.79E-306 |
| SCSI        | -1.33E-01 | 6.90E-03 | -1.93E+01 | 4.72E-77  |
| ED          | -1.43E-02 | 5.49E-04 | -2.60E+01 | 1.03E-130 |
| ROIsze      | 1.92E-05  | 5.73E-06 | 3.36E+00  | 7.93E-04  |
| RRV         | -2.28E-01 | 7.41E-02 | -3.07E+00 | 2.15E-03  |
| SC:ED       | 1.21E-03  | 6.83E-05 | 1.78E+01  | 3.04E-66  |
| SC:ROIsze   | -2.57E-06 | 9.90E-07 | -2.60E+00 | 9.48E-03  |
| SC:RRV      | 4.86E-02  | 9.12E-03 | 5.33E+00  | 1.07E-07  |
| ED:ROIsze   | 3.78E-07  | 7.06E-08 | 5.35E+00  | 9.45E-08  |
| ROIsze:RRV  | 2.11E-05  | 9.73E-06 | 2.17E+00  | 3.04E-02  |

explained variances

|    |             | r2 full (cum.) | r2 single |
|----|-------------|----------------|-----------|
| 1. | ED          | 0.43           | 0.43      |
| 2. | SCSI        | 0.58           | 0.38      |
| 3. | ROIsze      | 0.62           | 0.10      |
| 4. | SCSI:ED     | 0.66           | 0.49      |
| 5. | RRV         | 0.67           | 0.01      |
| 6. | SCSI:RRV    | 0.68           | 0.04      |
| 7. | ED:ROIsze   | 0.68           | 0.01      |
| 8. | SCSI:ROIsze | 0.68           | 0.01      |
| 9. | ROIsze:RRV  | 0.68           | 2.55E-05  |

**gamma band with filtering (SC, G=100, best fit to fMRI-FC)**  
coefficients

|              | Estimate  | SE       | tStat     | pValue    |
|--------------|-----------|----------|-----------|-----------|
| (Intercept)  | 1.65E+00  | 3.99E-02 | 4.13E+01  | 7.91E-279 |
| SCSI         | -1.35E-01 | 6.34E-03 | -2.13E+01 | 2.96E-92  |
| ED           | -1.39E-02 | 5.05E-04 | -2.75E+01 | 2.50E-144 |
| ROIsizes     | 1.53E-05  | 5.26E-06 | 2.91E+00  | 3.60E-03  |
| RRV          | -2.08E-01 | 6.81E-02 | -3.06E+00 | 2.24E-03  |
| SC:ED        | 1.28E-03  | 6.28E-05 | 2.03E+01  | 1.19E-84  |
| SC:ROIsizes  | -2.64E-06 | 9.10E-07 | -2.90E+00 | 3.80E-03  |
| SC:RRV       | 4.56E-02  | 8.38E-03 | 5.44E+00  | 5.77E-08  |
| ED:ROIsizes  | 3.19E-07  | 6.49E-08 | 4.92E+00  | 9.11E-07  |
| ROIsizes:RRV | 2.58E-05  | 8.94E-06 | 2.89E+00  | 3.89E-03  |

explained variances

|    |               | r2 full (cum.) | r2 single |
|----|---------------|----------------|-----------|
| 1. | ED            | 0.43           | 0.43      |
| 2. | SCSI          | 0.58           | 0.39      |
| 3. | SCSI:ED       | 0.63           | 0.48      |
| 4. | ROIsizes      | 0.66           | 0.08      |
| 5. | RRV           | 0.68           | 0.00      |
| 6. | SCSI:RRV      | 0.68           | 0.04      |
| 7. | ED:ROIsizes   | 0.69           | 0.02      |
| 8. | SCSI:ROIsizes | 0.69           | 0.03      |
| 9. | ROIsizes:RRV  | 0.69           | 3.00E-04  |

**fMRI**

## coefficients

|              | Estimate  | SE       | tStat     | pValue    |
|--------------|-----------|----------|-----------|-----------|
| (Intercept)  | 6.78E-01  | 2.50E-02 | 2.72E+01  | 5.02E-141 |
| SCSI         | -5.58E-02 | 4.26E-03 | -1.31E+01 | 7.69E-38  |
| ED           | -4.76E-03 | 3.31E-04 | -1.44E+01 | 5.19E-45  |
| ROIsizes     | 2.91E-06  | 1.74E-06 | 1.67E+00  | 9.42E-02  |
| RRV          | -1.65E-01 | 6.05E-02 | -2.73E+00 | 6.43E-03  |
| SC:ED        | 5.35E-04  | 5.27E-05 | 1.02E+01  | 1.03E-23  |
| SC:RRV       | 3.02E-02  | 7.26E-03 | 4.15E+00  | 3.41E-05  |
| ED:RRV       | -2.37E-03 | 7.26E-04 | -3.27E+00 | 1.11E-03  |
| ROIsizes:RRV | 1.58E-05  | 7.67E-06 | 2.06E+00  | 3.94E-02  |

## explained variances

|    |              | r2 full (cum.) | r2 single |
|----|--------------|----------------|-----------|
| 1. | ED           | 0.19           | 0.19      |
| 2. | SCSI         | 0.23           | 0.14      |
| 3. | SC:ED        | 0.27           | 0.18      |
| 4. | RRV          | 0.28           | 0.03      |
| 5. | ROIsizes     | 0.28           | 0.03      |
| 6. | SC:RRV       | 0.28           | 0.05      |
| 7. | ED:RRV       | 0.29           | 0.08      |
| 8. | ROIsizes:RRV | 0.29           | 0.01      |

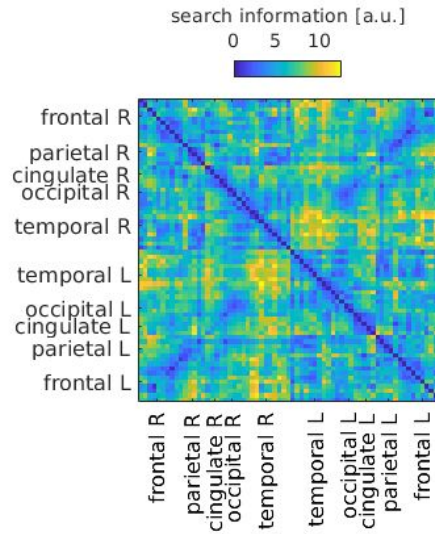

Figure S1: (related to Results - “SC provides additional predictive power for EEG-FC” and Methods- “Search Information”) Search information matrix used in the GLM and FC-correlation analyses.

**A - Relationship between SC, FC, and Euclidean distance**

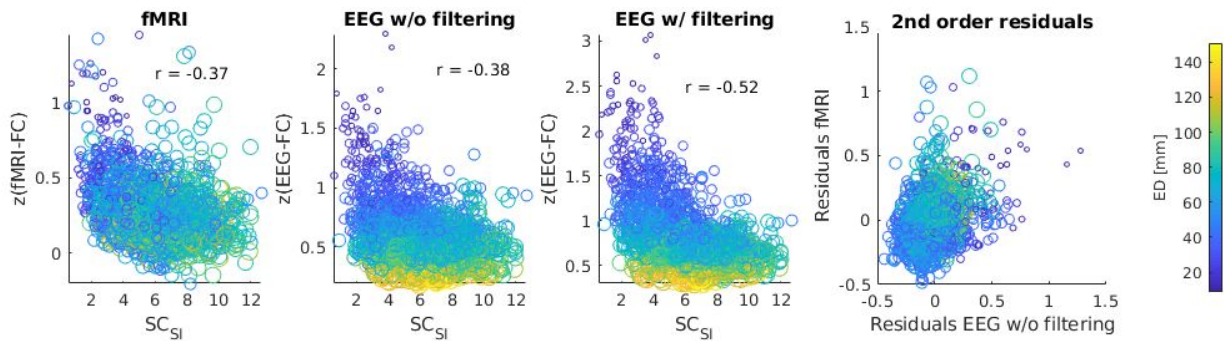

**B - Distribution of 1st order residuals**

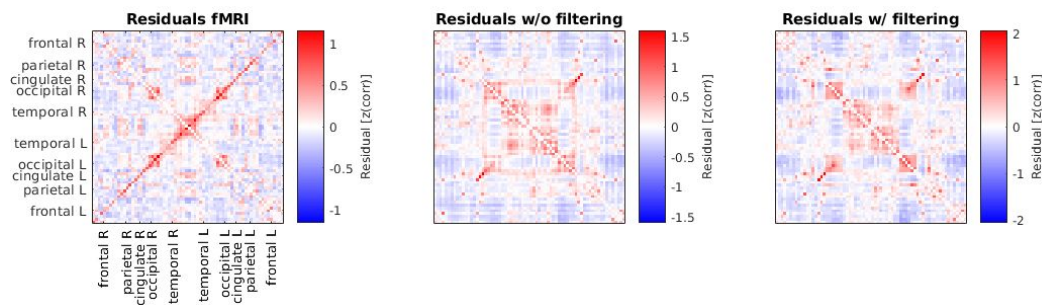

Figure S2: (related to GLM analysis) **A**: In the first three panels, z-transformed FC-values are plotted against  $SC_{Si}$  for fMRI, EEG before and EEG after filtering ( $G=100$ , ED match). In the fourth panel, the FC values that remain unexplained after regressing out Euclidean distance as well as  $SC_{Si}$  (2nd order residuals) are plotted for EEG and fMRI in order to highlight the differences between the modalities. A positive residual means that the FC was underestimated, a negative one, overestimated. Sizes and colors of the circles code for the Euclidean distance. **B**: Residuals of single-variable GLM which predicts FC solely from  $SC_{Si}$ .

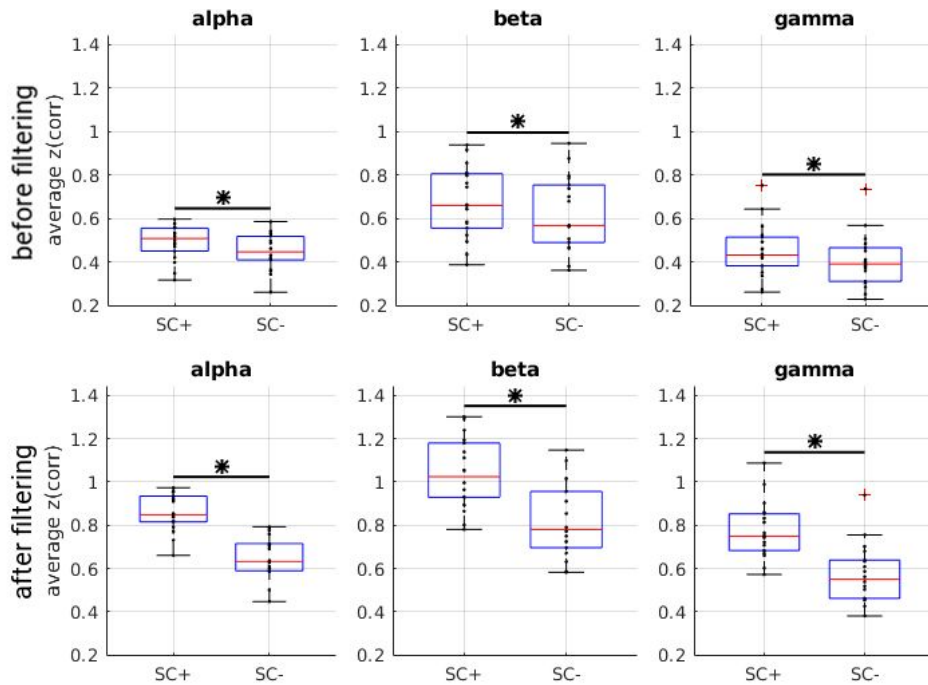

Figure S3: (related to Figure 2B) Comparison between average EEG-FC values for pairs that are connected by SC (“SC+”) and those that are not (“SC-”), before (top row; identical to main manuscript) and after (bottom row) filtering. The samples that are compared are matched in their ED distribution to control for the fact that pairs that are connected tend to be closer together than those that are not. Stars mark significant results according to the Wilcoxon signed-rank test at  $\alpha=0.05$  (Bonferroni-corrected for multiple comparisons).

**A** - Correlation of white Gaussian noise-FC with fMRI-FC

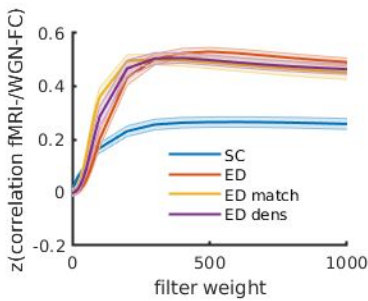

**B** - Correlation of filtered EEG-FCs with white Gaussian noise-FCs

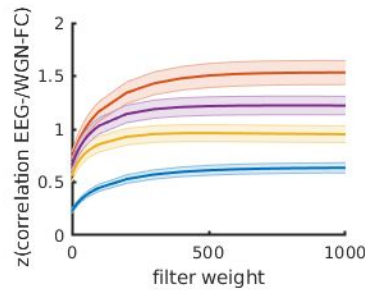

Figure S4: (related to Results) Results of graph filtering applied to white Gaussian noise (WGN). **A**: Correlation of FCs derived from filtered WGN with fMRI-FC (similar to Figure 4A). **B**: Similarity between filtered EEG-FCs and WGN-FCs. For each value of  $G$ , the best-fitting WGN-FC (out of all values of  $G$ ) was selected and the correlation is shown.



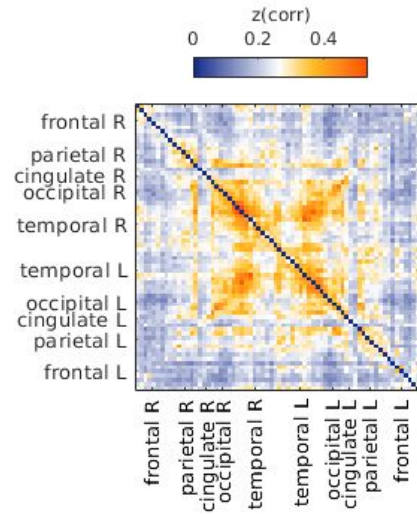

Figure S5: (Related to Results: “Graph filtering increases resemblance between EEG-FC and fMRI-FC“, and Discussion: “Comparison to other methods that attenuate volume conduction”) Average EEG-FC (without filtering) after each individual’s EEG signals were orthogonalized.

**A** - Correlations between fMRI- & EEG-FCs (coherence)

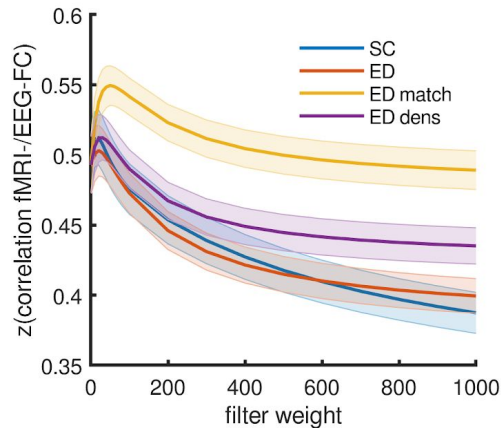

**B** - Boxplots of correlations

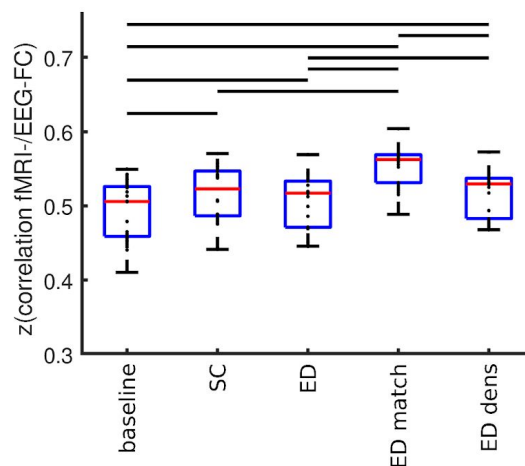

Figure S6: (related to Discussion) **A**: Fit (z-transformed correlation) between the EEG-FC (beta band, *coherence*) computed from time courses with different filter weights (G) and the fMRI-FC. The shaded regions mark the 95% confidence interval. **B**: Boxplots showing results of the Wilcoxon signed rank test comparing the maximum fits (shown in panel A) across versions of the SC as well as to the baseline correlation between unfiltered EEG-FC and fMRI-FC. Black bars mark significant differences. Red lines mark the median, each black dot marks the value for one subject.

**A** - Correlations between fMRI- & EEG-FCs (imaginary part of coherence)

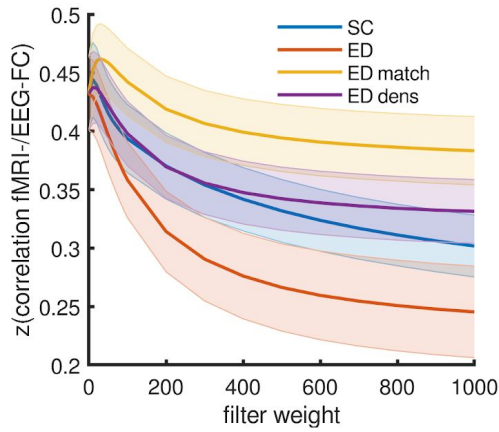

**B** - Boxplots of correlations

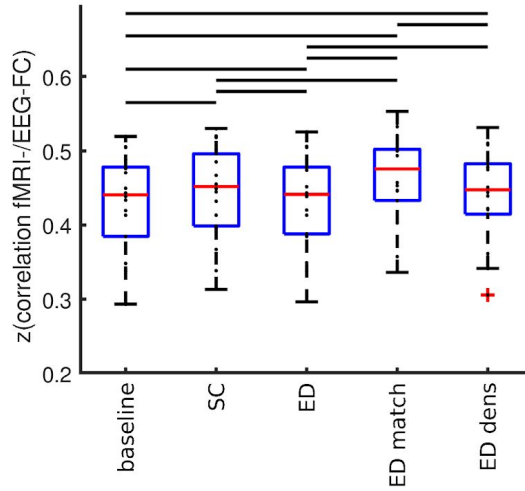

Figure S7: (related to Discussion) **A**: Fit (z-transformed correlation) between the EEG-FC (beta band, *imaginary part of coherence*) computed from time courses with different filter weights (G) and the fMRI-FC. The shaded regions mark the 95% confidence interval. **B**: Boxplots showing results of the Wilcoxon signed rank test comparing the maximum fits (shown in panel A) across versions of the SC as well as to the baseline correlation between unfiltered EEG-FC and fMRI-FC. Black bars mark significant differences. Red lines mark the median, each black dot marks the value for one subject.

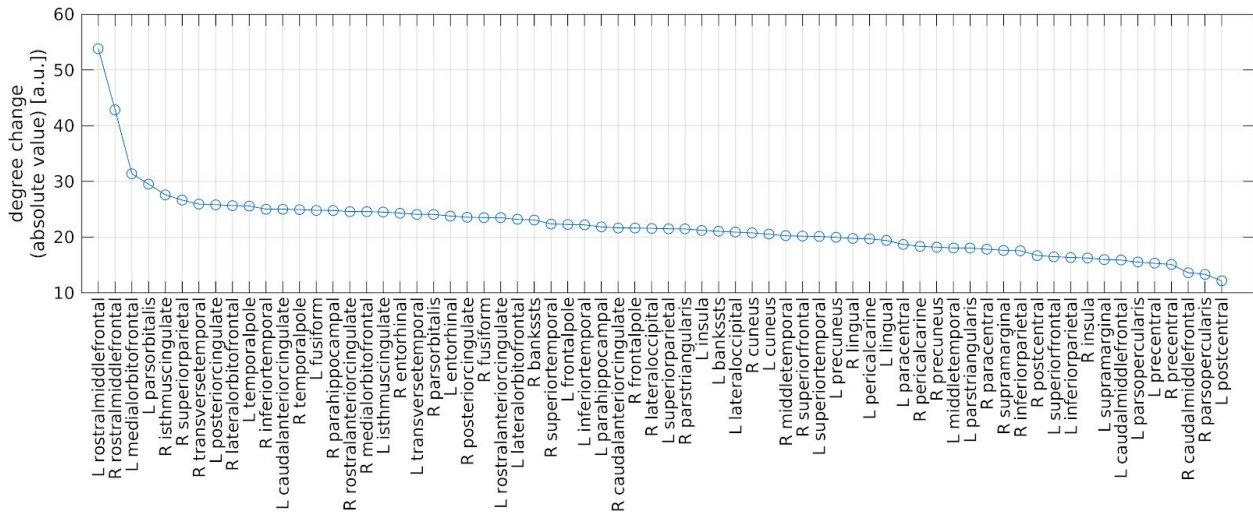

Figure S8: (related to Figure 6) Degree changes of all 68 ROIs induced by filtering. Average EEG-FCs of the beta band before and after filtering (G=100, "ED match", best fit to fMRI-FC) were resampled and the absolute values of the difference was taken. The values plotted here are the sums over the rows/columns.

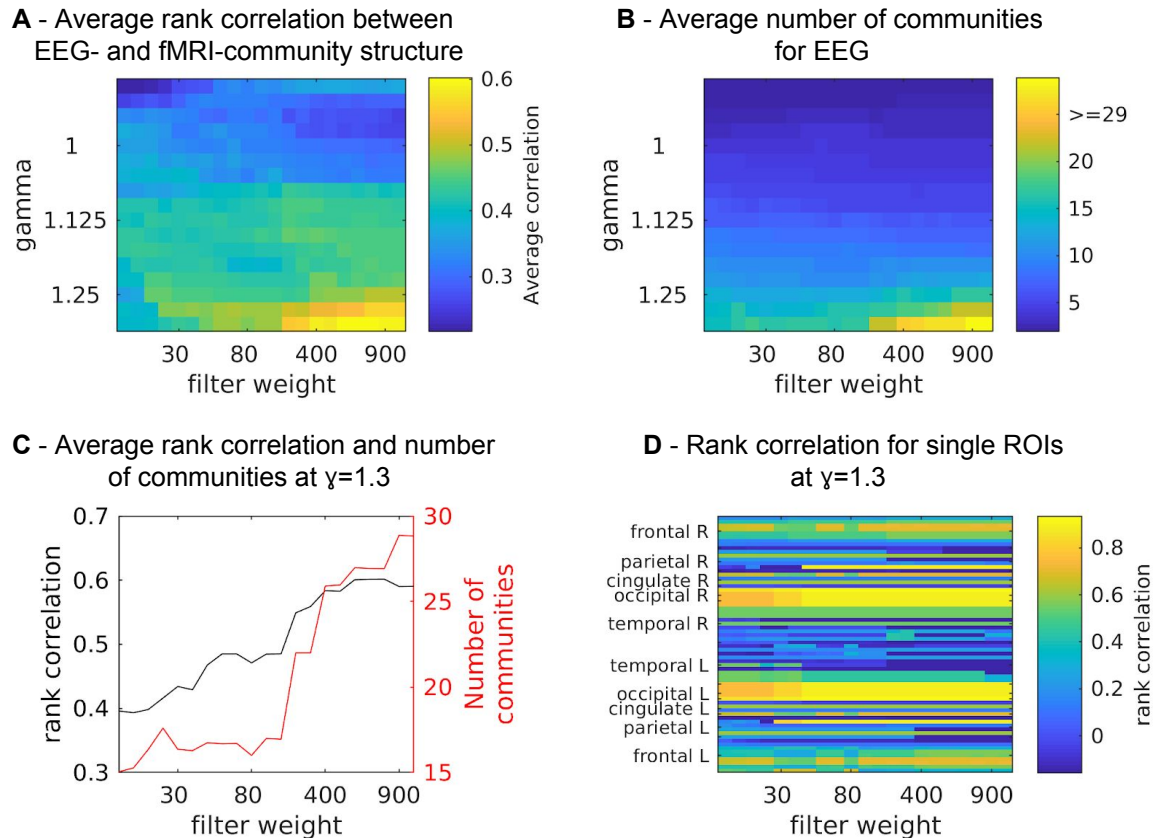

Figure S9: (related to Figure 9) Results of the community analysis when the number of communities is not limited to be no greater than 7. **A:** Agreement between community structure of EEG- and fMRI-FC as measured by average rank correlations between “community matrices” (not shown). In this case, the overall maximum of 0.60 in community agreement as measured by rank correlation between community matrices is found at  $G=700$  and  $\gamma=1.3$ . **B:** Average number of communities found by the Louvain clustering algorithm. At  $G=700$  and  $\gamma=1.3$ , the number of communities is 27. **C:** Rank correlations and number of communities for  $\gamma=1.3$ . **D:** Rank correlations between rows/columns of “community matrices” of EEG- and fMRI-FC, for  $\gamma=1.3$ .

**A** - Average rank correlation between EEG- and fMRI-community structure

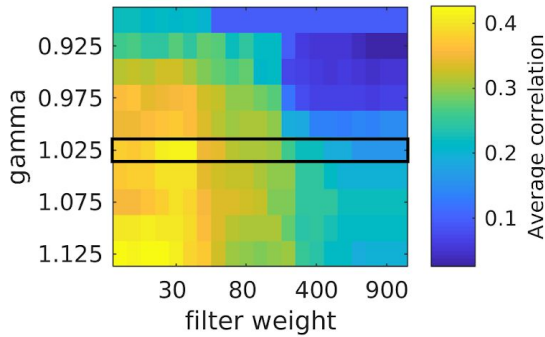

**B** - Average number of communities for EEG

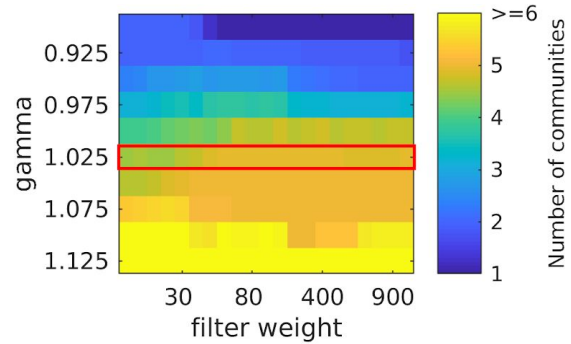

**C** - Average rank correlation and number of communities at  $\gamma=1.025$

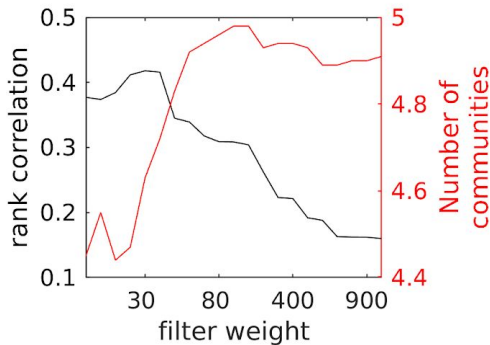

**D** - Rank correlation for single ROIs at  $\gamma=1.025$

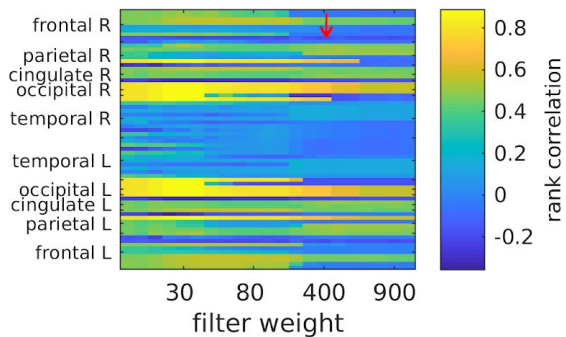

Figure S10: (related to Discussion; similar to Figure 9) Results of the community analysis when using the SC graph as a filter. **A**: Agreement between community structure of EEG- and fMRI-FC as measured by average rank correlations between “community matrices” (not shown). The black box marks the  $\gamma$  which is shown in panel C. **B**: Average number of communities found by the Louvain clustering algorithm. The red box marks the  $\gamma$  which is shown in panel C. **C**: Rank correlations and number of communities for  $\gamma=1.025$  (marked in the same colors in panels A and B). **D**: Rank correlations between rows/columns of “community matrices” of EEG- and fMRI-FC, for  $\gamma=1.025$  (marked with colored boxes in panels A and B). The red arrow marks the area for which rank correlations of parietal areas are increased - see Figure S5.

**A - Community co-assignments of right paracentral lobule before filtering**

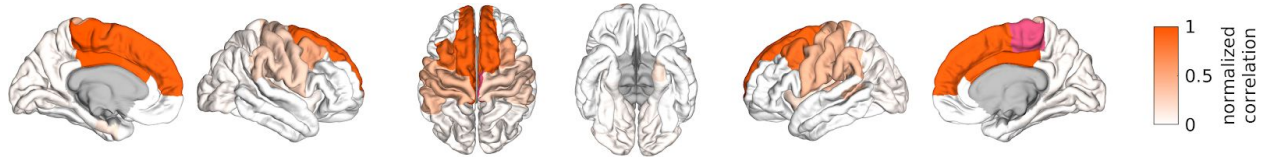

**B - Community co-assignments of right paracentral lobule after filtering with the SC graph, G=400**

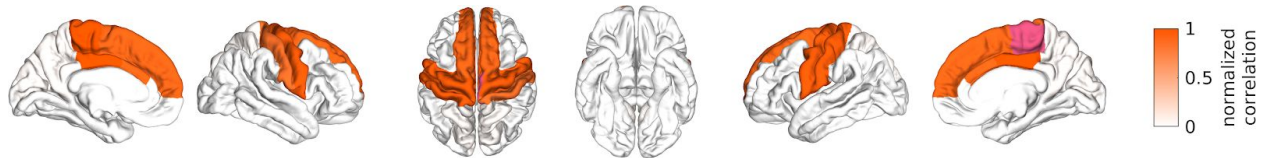

**C - Community co-assignments of right paracentral lobule in fMRI**

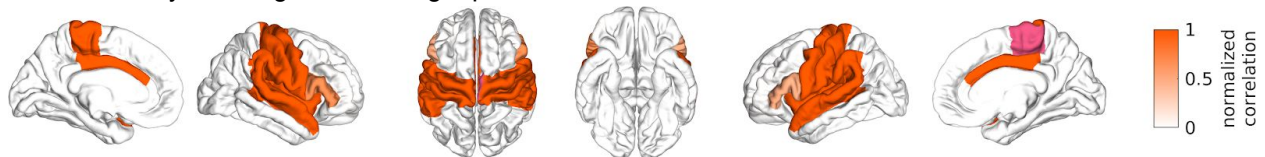

Figure S11: (related to Discussion) Community co-assignments of right paracentral lobule. **A:** Before filtering, this region is mostly grouped with some frontal regions. This figure looks different from what is shown for the same region in Figure 11A because the values of  $\gamma$  are different. **B:** After filtering *with the SC graph*, the region is robustly grouped with bilateral pre- and postcentral gyri, however, the grouping with the frontal regions is not removed. Most importantly, the overall fit to the fMRI community structure for these parameter settings ( $\gamma=1.025$ ,  $G=400$ ) is only 0.22. **C:** In fMRI, this network includes the insula as well as some temporal regions and is symmetrical.

Table S2: (related to Results: “Graph filtering increases resemblance between EEG-FC and fMRI-FC“, and Discussion: “Comparison to other methods that attenuate volume conduction”) Subject-wise correlations between EEG-FC and fMRI-FC with and without filtering as well as with orthogonalization (without filtering).

| S               | 1    | 2    | 3    | 4    | 5    | 7    | 8    | 9    | 12   | 13   | 14   | 15   | 16   | 17   | 18   | 19   | 20   | 21   |
|-----------------|------|------|------|------|------|------|------|------|------|------|------|------|------|------|------|------|------|------|
| unfiltered      | 0.36 | 0.41 | 0.41 | 0.46 | 0.44 | 0.48 | 0.46 | 0.49 | 0.42 | 0.42 | 0.51 | 0.49 | 0.51 | 0.44 | 0.29 | 0.27 | 0.41 | 0.36 |
| filtered (best) | 0.50 | 0.52 | 0.51 | 0.54 | 0.50 | 0.56 | 0.54 | 0.54 | 0.48 | 0.51 | 0.55 | 0.56 | 0.53 | 0.54 | 0.41 | 0.40 | 0.50 | 0.51 |
| orthogonalized  | 0.05 | 0.08 | 0.31 | 0.27 | 0.16 | 0.19 | 0.20 | 0.22 | 0.30 | 0.23 | 0.12 | 0.32 | 0.31 | 0.19 | 0.01 | 0.14 | 0.17 | 0.26 |
